# Supplementary material for: Innovative Bio-Vehicle For Resveratrol And Tocopherol Based On Quinoa 11s Globulin. Nanocomplexes Design And Characterization
Source: Preprints.org preprint supplement (doi:10.20944/preprints202407.1087.v1), 2024-07-15
Supplement: Supplementary file 1 [file supplementary]

## Sheet: Hoja1
Bioactive compound	n	Kd(uM)	Ka(M-1)	DH(kJ/mol)	DS(J/K*mol)	DG(kJ/mol)
TOC	0.85 ± 0.03	340 ± 40	(2.9 ± 0.8) * 10^3	45.2 ± 2	104 ± 12	19.7 ± 1
RSV	0.91 ± 0.04	48.2 ± 1	(2.1 ± 0.3) * 10^4	43 ± 7	63 ± 5	24.6 ± 0.2

## Sheet: Hoja1 (2)
Bioactive compound	n	Kd(uM)	Ka(M-1)	DH(kJ/mol)	DS(J/K*mol)	DG(kJ/mol)
TOC	0.65 ± 0.03	72.9 ± 4	(1.4 ± 0.1) * 10^4	-14.2 ± 2	31.6 ± 12	19.7 ± 1
RSV	0.29 ± 0.04	7.46 ± 0.3	(1.3 ± 0.1) * 10^5	-99 ± 9	63 ± 5	24.6 ± 0.2
